# Supplementary material
Source: publisher site journal article supplement (http://journals.cambridge.org/fulltext_content/supplementary/MAM20_S3/assets/7337/1112.pdf)
Supplement: Supplementary file 1 [file 1112.pdf]

 


Judgment and Decision Making | Cambridge Core


Skip to main content

Accessibility help

We use cookies to distinguish you from other users and to provide you with a better experience on our websites. Close this message to accept cookies or find out how to manage your cookie settings.

## Login Alert

Cancel

Log in

×

×

- Home

- Log in
- Register
- Browse subjects
- Publications
- Open research
- Services
- About Cambridge Core
- Cart

- Cart

- Institution login
- Register
- Log in
- Cart

Home

- Home

- Log in
- Register
- Browse subjects
- Publications
- Open research
- Services
- About Cambridge Core
- Cart

- Cart

- Institution login
- Register
- Log in
- Cart

- < Back to search results

1. Home
2. Journals
3. Judgment and Decision Making

- English
- Français

# Judgment and Decision Making

- Add bookmark
- Add alert
- RSS feed
- Share

Search within full text

- Submit your article
- Announcements

Submit your article

This journal utilises an Online Peer Review Service (OPRS) for submissions. By clicking "Continue" you will be taken to our partner site
https://mc.manuscriptcentral.com/jdm.
Please be aware that your Cambridge account is not valid for this OPRS and registration is required. We strongly advise you to read all "Author instructions" in the "Journal information" area prior to submitting.

Cancel

Continue

×

- Other actions

   

  - Submit your article
  - Information
  - Announcements
  - - Add bookmark
    - Add alert
    - RSS Feed
    - Share

- **Visit:**

Journal Home

- Journal home
- Journal information
- Latest volume
- Most read
- All issues
- Announcements


journal-listing


## Listing filters

Reset all filters

Search articles:   Search author:   Article type:

Select article type

collapsed

 

Select access type:

Items I can access

Open Access

Show more filters

Publication year:

From  To

 Apply
 publication year filter

Download page results (10)
 
Export citation results (10)

Order by

RelevancePublication date (oldest > newest)Publication date (newest > oldest)Title (A-Z)Title (Z-A)Most cited

Layout

2 column viewList view

Order by

RelevancePublication date (oldest > newest)Publication date (newest > oldest)Title (A-Z)Title (Z-A)Most cited

Download page results (10)
 
Export citation results (10)

## 978 articles in Judgment and Decision Making

Theory Article

Open access
  Access

### A psychological model of collective risk perceptions

 Volume 19 

Sergio Pirla

Published by Cambridge University Press:

15 April 2024

Show abstractof A psychological model of collective risk perceptions

Read article  on A psychological model of collective risk perceptions Download PDF  of A psychological model of collective risk perceptions

92 Downloads

Review Article

Open access
  Access

### Behavioral economics enhancers

 Volume 19 

Eldad Yechiam

Published by Cambridge University Press:

11 April 2024

Show abstractof Behavioral economics enhancers

Read article  on Behavioral economics enhancers Download PDF  of Behavioral economics enhancers

126 Downloads

Empirical Article

Open access
  Access

### The Dutch moral foundations stimulus database: An adaptation and validation of moral vignettes and sociomoral images in a Dutch sample

 Volume 19 

Frederic R. Hopp, 
Benjamin Jargow, 
Esmee Kouwen, 
Bert N. Bakker

Published by Cambridge University Press:

02 April 2024

Show abstractof The Dutch moral foundations stimulus database: An adaptation and validation of moral vignettes and sociomoral images in a Dutch sample

Read article  on The Dutch moral foundations stimulus database: An adaptation and validation of moral vignettes and sociomoral images in a Dutch sample Download PDF  of The Dutch moral foundations stimulus database: An adaptation and validation of moral vignettes and sociomoral images in a Dutch sample

366 Downloads

Empirical Article

Open access
  Access

### Factors that promote the repulsion effect in preferential choice

 Volume 19 

Pronobesh Banerjee, 
William M. Hayes, 
Promothesh Chatterjee, 
Tamara Masters, 
Sanjay Mishra, 
Douglas H. Wedell

Published by Cambridge University Press:

01 April 2024

Show abstractof Factors that promote the repulsion effect in preferential choice

Read article  on Factors that promote the repulsion effect in preferential choice Download PDF  of Factors that promote the repulsion effect in preferential choice

175 Downloads

Empirical Article

Open access
  Access

### Negative economic shocks and the compliance to social norms

 Volume 19 

Francesco Bogliacino, 
Rafael Charris, 
Camilo Gómez, 
Felipe Montealegre

Published by Cambridge University Press:

11 March 2024

Show abstractof Negative economic shocks and the compliance to social norms

Read article  on Negative economic shocks and the compliance to social norms Download PDF  of Negative economic shocks and the compliance to social norms

405 Downloads

Empirical Article

Open access
  Access

### Eye movements as a tool to investigate exemplar retrieval in judgments

 Volume 19 

Agnes Rosner, 
Fabienne Brändli, 
Bettina von Helversen

Published by Cambridge University Press:

26 February 2024

Show abstractof Eye movements as a tool to investigate exemplar retrieval in judgments

Read article  on Eye movements as a tool to investigate exemplar retrieval in judgments Download PDF  of Eye movements as a tool to investigate exemplar retrieval in judgments

236 Downloads

Empirical Article

Open access
  Access

### Apocalypse now or later? Nuclear war risk perceptions mirroring media coverage and emotional tone shifts in Italian news

 Volume 19 

Marco Lauriola, 
Gabriele Di Cicco, 
Lucia Savadori

Published by Cambridge University Press:

21 February 2024

Show abstractof Apocalypse now or later? Nuclear war risk perceptions mirroring media coverage and emotional tone shifts in Italian news

Read article  on Apocalypse now or later? Nuclear war risk perceptions mirroring media coverage and emotional tone shifts in Italian news Download PDF  of Apocalypse now or later? Nuclear war risk perceptions mirroring media coverage and emotional tone shifts in Italian news

294 Downloads

Empirical Article

Open access
  Access

### The impact of experience on the tendency to accept recommended defaults

 Volume 19 

Yefim Roth, 
Greta Maayan Waldman, 
Ido Erev

Published by Cambridge University Press:

12 February 2024

Show abstractof The impact of experience on the tendency to accept recommended defaults

Read article  on The impact of experience on the tendency to accept recommended defaults Download PDF  of The impact of experience on the tendency to accept recommended defaults

363 Downloads

Empirical Article

Open access
  Access

### Repeated risky choices become more consistent with themselves but not expected value, with no effect of matched trial order

 Volume 19 

Jake Spicer, 
Timothy L. Mullett, 
Adam N. Sanborn

Published by Cambridge University Press:

16 January 2024

Show abstractof Repeated risky choices become more consistent with themselves but not expected value, with no effect of matched trial order

Read article  on Repeated risky choices become more consistent with themselves but not expected value, with no effect of matched trial order Download PDF  of Repeated risky choices become more consistent with themselves but not expected value, with no effect of matched trial order

397 Downloads

Theory Article

Open access
  Access

### The impact of diversity on group decision-making in the face of the free-rider problem

 Volume 19 

Chris M. Stolle, 
Bartosz Gula, 
Rongjun Yu, 
Yi Huang

Published by Cambridge University Press:

15 January 2024

Show abstractof The impact of diversity on group decision-making in the face of the free-rider problem

Read article  on The impact of diversity on group decision-making in the face of the free-rider problem Download PDF  of The impact of diversity on group decision-making in the face of the free-rider problem

754 Downloads

12345 >

 

Pick number of article per page

10 2050

 articles per page


- Librarians
- Authors
- Publishing partners
- Agents
- Corporates

- Additional Information

  - Accessibility
  - Our blog
  - News
  - Contact and help
  - Cambridge Core legal notices
  - Feedback
  - Sitemap

  Select your country preference

  Afghanistan
  Aland Islands
  Albania
  Algeria
  American Samoa
  Andorra
  Angola
  Anguilla
  Antarctica
  Antigua and Barbuda
  Argentina
  Armenia
  Aruba
  Australia
  Austria
  Azerbaijan
  Bahamas
  Bahrain
  Bangladesh
  Barbados
  Belarus
  Belgium
  Belize
  Benin
  Bermuda
  Bhutan
  Bolivia
  Bosnia and Herzegovina
  Botswana
  Bouvet Island
  Brazil
  British Indian Ocean Territory
  Brunei Darussalam
  Bulgaria
  Burkina Faso
  Burundi
  Cambodia
  Cameroon
  Canada
  Cape Verde
  Cayman Islands
  Central African Republic
  Chad
  Channel Islands, Isle of Man
  Chile
  China
  Christmas Island
  Cocos (Keeling) Islands
  Colombia
  Comoros
  Congo
  Congo, The Democratic Republic of the
  Cook Islands
  Costa Rica
  Cote D'Ivoire
  Croatia
  Cuba
  Cyprus
  Czech Republic
  Denmark
  Djibouti
  Dominica
  Dominican Republic
  East Timor
  Ecuador
  Egypt
  El Salvador
  Equatorial Guinea
  Eritrea
  Estonia
  Ethiopia
  Falkland Islands (Malvinas)
  Faroe Islands
  Fiji
  Finland
  France
  French Guiana
  French Polynesia
  French Southern Territories
  Gabon
  Gambia
  Georgia
  Germany
  Ghana
  Gibraltar
  Greece
  Greenland
  Grenada
  Guadeloupe
  Guam
  Guatemala
  Guernsey
  Guinea
  Guinea-bissau
  Guyana
  Haiti
  Heard and Mc Donald Islands
  Honduras
  Hong Kong
  Hungary
  Iceland
  India
  Indonesia
  Iran, Islamic Republic of
  Iraq
  Ireland
  Israel
  Italy
  Jamaica
  Japan
  Jersey
  Jordan
  Kazakhstan
  Kenya
  Kiribati
  Korea, Democratic People's Republic of
  Korea, Republic of
  Kuwait
  Kyrgyzstan
  Lao People's Democratic Republic
  Latvia
  Lebanon
  Lesotho
  Liberia
  Libyan Arab Jamahiriya
  Liechtenstein
  Lithuania
  Luxembourg
  Macau
  Macedonia
  Madagascar
  Malawi
  Malaysia
  Maldives
  Mali
  Malta
  Marshall Islands
  Martinique
  Mauritania
  Mauritius
  Mayotte
  Mexico
  Micronesia, Federated States of
  Moldova, Republic of
  Monaco
  Mongolia
  Montenegro
  Montserrat
  Morocco
  Mozambique
  Myanmar
  Namibia
  Nauru
  Nepal
  Netherlands
  Netherlands Antilles
  New Caledonia
  New Zealand
  Nicaragua
  Niger
  Nigeria
  Niue
  Norfolk Island
  Northern Mariana Islands
  Norway
  Oman
  Pakistan
  Palau
  Palestinian Territory, Occupied
  Panama
  Papua New Guinea
  Paraguay
  Peru
  Philippines
  Pitcairn
  Poland
  Portugal
  Puerto Rico
  Qatar
  Reunion
  Romania
  Russian Federation
  Rwanda
  Saint Kitts and Nevis
  Saint Lucia
  Saint Vincent and the Grenadines
  Samoa
  San Marino
  Sao Tome and Principe
  Saudi Arabia
  Senegal
  Serbia
  Seychelles
  Sierra Leone
  Singapore
  Slovakia
  Slovenia
  Solomon Islands
  Somalia
  South Africa
  South Georgia and the South Sandwich Islands
  Spain
  Sri Lanka
  St. Helena
  St. Pierre and Miquelon
  Sudan
  Suriname
  Svalbard and Jan Mayen Islands
  Swaziland
  Sweden
  Switzerland
  Syrian Arab Republic
  Taiwan
  Tajikistan
  Tanzania, United Republic of
  Thailand
  Togo
  Tokelau
  Tonga
  Trinidad and Tobago
  Tunisia
  Türkiye
  Turkmenistan
  Turks and Caicos Islands
  Tuvalu
  Uganda
  Ukraine
  United Arab Emirates
  United Kingdom
  United States
  United States Minor Outlying Islands
  United States Virgin Islands
  Uruguay
  Uzbekistan
  Vanuatu
  Vatican City
  Venezuela
  Vietnam
  Virgin Islands (British)
  Wallis and Futuna Islands
  Western Sahara
  Yemen
  Zambia
  Zimbabwe

  ## Join us online

- Legal Information

  - Rights & Permissions
  - Copyright
  - Privacy Notice
  - Terms of use
  - Cookies Policy
  - © Cambridge University Press 2024
  - Back to top

- © Cambridge University Press 2024
- Back to top

# 

Cancel

Confirm

×
